# Supplementary material
Source: publisher figshare collection journal article supplement (https://acs.figshare.com/ndownloader/files/17461595)
Supplement: Supplementary file 1 [file 17461595]

## Supporting Information

# Fully Printed $\mu$ -Needle Electrode Array from Conductive Polymer Ink for Bioelectronic Applications

*Sabine Zips,<sup>†</sup> Leroy Grob,<sup>†</sup> Philipp Rinklin,<sup>†</sup> Korkut Terkan,<sup>†</sup> Nouran Yehia Adly,<sup>†</sup> Lennart Jakob  
Konstantin Weiß,<sup>†</sup> Dirk Mayer,<sup>‡</sup> and Bernhard Wolfrum<sup>\*,†,‡</sup>*

<sup>†</sup> Neuroelectronics - Munich School of Bioengineering, Department of Electrical and Computer Engineering, Technical University of Munich, Boltzmannstr. 11, 85748 Garching, Germany

<sup>‡</sup> Institute of Complex Systems, Bioelectronics (ICS-8), Forschungszentrum Jülich, 52425 Jülich, Germany

### Corresponding Author

\*E-mail: [bernhard.wolfrum@tum.de](mailto:bernhard.wolfrum@tum.de)

For measuring the conductivity of the PEDOT:PSS-MWCNT composite ink, electrodes with contact pads were aerosol-jet printed onto a Q83 substrate using an aerosol-jet printing system from Optomec (Albuquerque, USA; see Figure S1) integrated in an inkjet-printing system from Ceradrop (F-series, Limoges, France). The system generated the aerosol pneumatically using a pre-humidified nitrogen gas stream. The electrodes were fabricated with a writing speed of 1 mm s<sup>-1</sup>, trace spacing of 25 µm, a push flow of 50 sccm (standard cubic centimeter per minute), and a focusing ration of 3 using a 250 µm nozzle. The temperature of the substrate holder was held at 58 °C. After printing, the solvents in the material were evaporated at 150 °C overnight. A potentiostat (VSP-300, BioLogic Science Instruments, Seyssinet-Pariset, France) was then used to apply a voltage ramp (0 V to 0.6 V with 5 mV s<sup>-1</sup>) to the electrodes in a 4-point measurement setup and the current was recorded to assess the resistance  $R$ . The length  $l$  was measured optically (DM 2700 M, Leica, Wetzlar, Germany; Discovery.V20 SteREO, Zeiss, Oberkochen, Germany), the cross-sectional area  $A$  was measured with a laser scanning microscope (VK-X250, Keyence, Osaka, Japan) and evaluated with MultiFileAnalyzer (Keyence, Osaka, Japan). The conductivity  $\sigma$  was then calculated using the relation

$$\sigma = \frac{l}{A \cdot R}. \quad (\text{S1})$$

The measured average conductivity was 323±75 S m<sup>-1</sup>(n = 5).

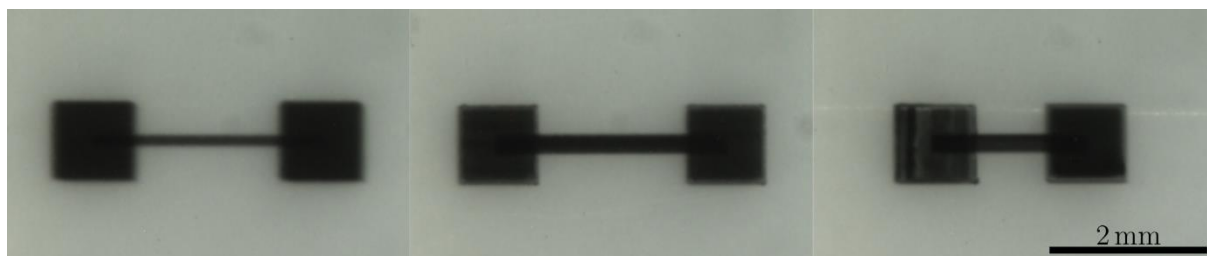

**Figure S1.** Aerosol-jet printed test structures for assessing the conductivity of the PEDOT:PSS-MWCNT composite ink.

A SEM image was taken from a passivated  $\mu$ -needle microelectrode array (MEA) to show the three-dimensional structure of the electrode tips. The  $\mu$ -needle MEA was first sputtered for 40 s with gold at 0.05 mbar argon gas pressure (MED 020, BAL-TEC, Balzers, Liechtenstein) and then characterized with SEM (JSM-6060LV, Jeol, Tokyo, Japan).

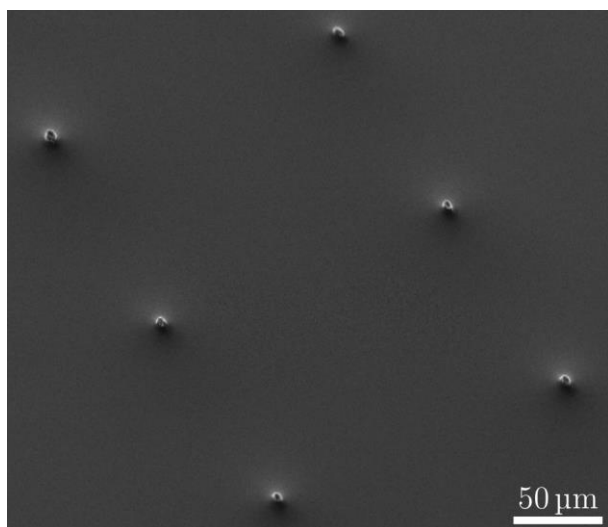

**Figure S2.** SEM image of a passivated  $\mu$ -needle MEA.

The  $\mu$ -needle MEAs were used to record signals from cardiomyocyte-like HL-1 cells. Time traces from three neighboring electrodes spaced  $250\ \mu\text{m}$  apart are shown in Figure S3. The observed phase delay between the traces indicates a local recording of the cell signals at the individual electrodes.

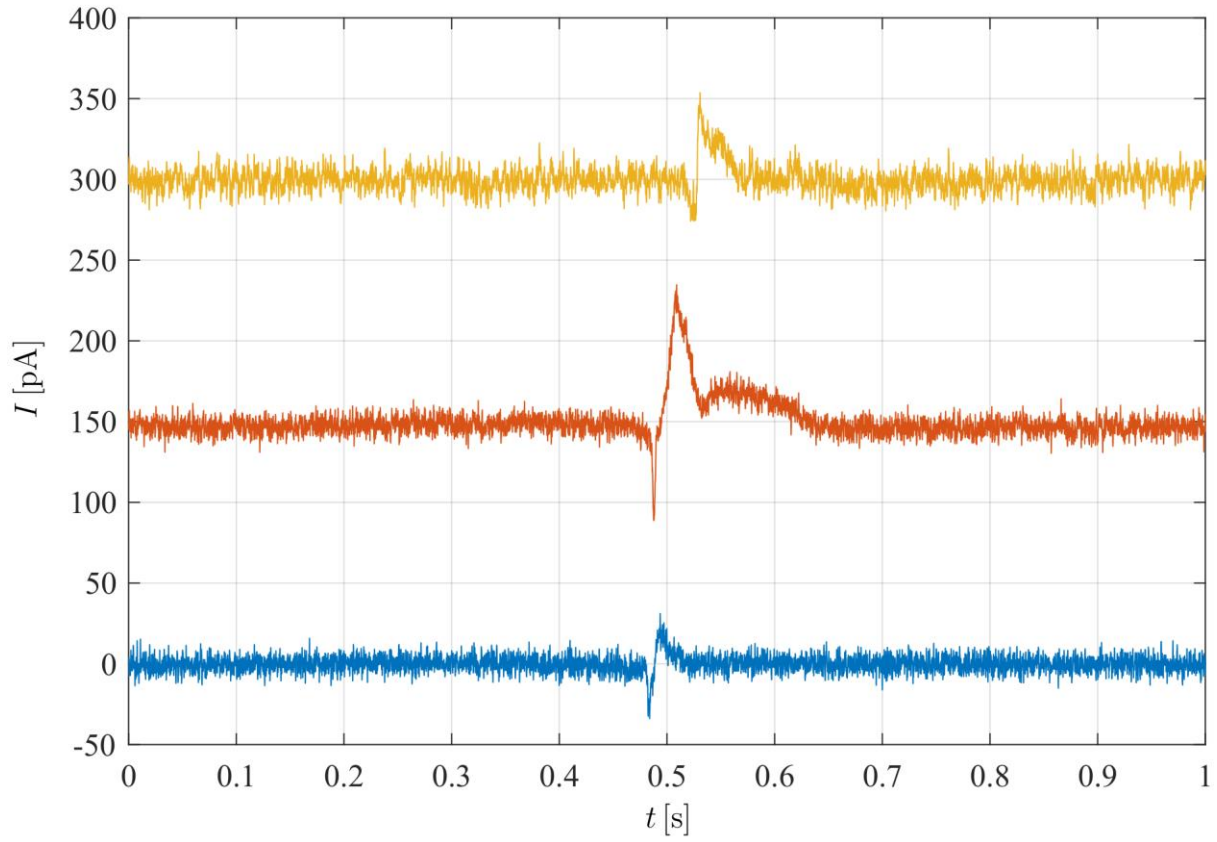

**Figure S3.** Recorded cell signals from three neighboring electrodes spaced  $250\ \mu\text{m}$  apart. For presentation reasons, an arbitrary offset was added to the traces.
